# Supplementary material
Source: publisher site journal article supplement (https://www.dovepress.com/article/233667)
Supplement: Supplementary file 1 [file get_supplementary_file.php]

Supplemental Table 1 – Clinical, genetic and metabolic characteristics, ejection fraction, other echocardiography parameters and left ventricular global longitudinal strain of 22 patients with congenital generalized lipodystrophy

| **Case (initials)**  **Gender/age** | **Mutation**  **(gene)** | **EF,**  **ECHO paramaters** | **GLS** | **Metabolic characteristics** | **Drugs** |
| --- | --- | --- | --- | --- | --- |
| FLC  ♂, 5m | AGPAT2 | 72%  LVH | - 23.5% | ↑TG, ↑TC, ↑Ac1, ↓HDL-c, DM, ↑HOMA | Insulin , MTF |
| KCS  ♀, 3y | NA | 67% | -21.8%* | ↑TG, ↓HDL-c, ↑TC, ↑HOMA | No |
| DDLV  ♀, 4y | NA | 74% | -19.6%* | ↓HDL-c, ↑HOMA | No |
| RYT  ♂, 4y | BSCL2 | 78% | -20.3%* | ↑TG, ↑TC, ↓HDL-c | No |
| FMM  ♀, 5y | AGPAT2 | 77% | -24% | ↓HDL-c, ↑HOMA | No |
| CMFM  ♂, 6y | NA | 75% | -18.2%* | ↑TG , ↓HDL-c, ↑HOMA,↑INSULIN, DM | No |
| NLG  ♂, 6y | NA | 75% | -23.4% | ↓HDL-c | No |
| RMT  ♀, 7y | BSCL2 | 63%  ↑LAVI, LVH, MR,TR, Diast.D. | -16.7%* | ↑TG,↓HDLc,↑HOMA,↑INSULIN  DM | MTF |
| KEBS  ♀, 9y | AGPAT2 | 72% | -19.3%* | ↑TG, ↓HDL-c, ↑HOMA  ↑INSULIN | No |
| JAG  ♂, 11y | NA | 85%  ↑LVDS | -21.1% | ↑TG, ↓HDL-c | MTF |
| ACBL  ♀, 12y | BSCL2 | 77%  ↑LAVI,↑LVDS  MR,TR, Diast.D | -20.4% | ↑TG, ↑Ac1, ↓HDLc, ↑HOMA, DM | MTF, Pioglitazone |
| LCS  ♂, 12y | BSCL2 | 69%  ↑LVDS, ↑LAVI, LVH, Diast. D | -17.8%* | ↑TG, ↑TC, ↑Ac1, ↓HDL-c ↑HOMA,↑INSULIN , DM | Insulin, MTF, Statin, Pioglitazone, Ω3 |
| PS  ♀, 14y | BSCL2 | 59%  ↑LVDS,↑LVDD, LVH, MR, AR, RT, Diast. D | -17.5%* | ↑TG, ↑TC, ↓HDL-c ↑Ac1,↑HOMA , DM | Insulin, MTF, Pioglitazone,  Fibrate,Acarbose |
| DRM  ♂, 15y | NA | 76% | -18.3%* | ↑TG, ↓HDL-c , DM | MTF |
| PCSF  ♂, 16y | BSCL2 | 69%  LVH, ↑LAVI,  Diast. D | -17.7%* | ↑TG, ↑Ac1,↑HOMA,  ↑INSULIN ,DM | MTF |
| LFS  ♀, 20y | NA | 65% | -21.7% | ↑TG, ↑TC, ↓HDL-c, ↑HOMA  DM | MTF, Fibrate |
| RAL  ♀, 21y | NA | 69% | -13.9%* | ↑TG, ↑TC, ↑Ac1, ↓HDLc,  ↑HOMA, DM | Insulin, MTF |
| BMS  ♀, 27y | AGPAT2 | 76%  ↑LAVI, LVH,  Diast. D | -17.9%* | ↑TG, ↑TC, ↑Ac1, ↓HDLc,  ↑HOMA,↑INSULIN  DM, ↑BP | Insulin, MTF, Spin Pioglitazone, Fibrate, Statin, Aspirin, Losartan, Atenolol,PPT |
| ACLS  ♀, 28y | NA | 63%  ↑LAVI, RM,  Diast. D | -17.2%* | ↑TG, ↑TC, ↑Ac1, ↓HDL-c ↑HOMA,↑INSULIN, DM,↑BP | Insulin, MTF, Pioglitazone,  Fibrate, Ω3 |
| MCV  ♂, 30y | NA | 62% | -17.0%* | ↑TG, ↑Ac1,  ↓HDL-c, DM | Insulin, MTF |
| RMAS  ♀, 32y | NA | 57%  LVH, Diast. D | -16.1%* | ↑TG, ↑Ac1, ↓HDL-c  ↑HOMA,↑INSULIN, DM, ↑BP | Insulin, MTF, Losartan |
| MIM  ♀, 38y | NA | 78% | -21.3% | ↑TG, ↑TC, ↑Ac1, ↓HDL-c ↑INSULIN, DM, ↑BP | Insulina, MTF, Captoril |

ECHO = conventional echocardiogram, EF = ejection fraction, LVH = left ventricular hipertrophy, LAVI = left atrial volume index, LVDD = left ventricular end-diastolic diameter, LVDS = left ventricular end-systolic diameter, MR = mitral regurgitation, TR = tricuspid regurgitation, AR= aortic regurgitation, Diast. D. = diastolic dysfunction, GLS = global longitudinal strain, NA = Not available, TG= tryglicerides, TC= total cholesterol, Ac1= glycohemoglobin A1c, HDL-c= high density lipoprotein cholesterol, DM= diabetes mellitus, BP= blood pressure, MTF= metformin, PPT=propylthiouracil, Spin= spironolactone, Ω3= omega 3, * = abnormal GLS
